# Supplementary material for: Genome-Wide Identification and Analysis of Stress Response of Trehalose-6-Phosphate Synthase and Trehalose-6-Phosphate Phosphatase Genes in Quinoa
Source: MDPI journal article supplement (doi:10.3390/ijms24086950), 2023-04-09
Supplement: s1 [file s1]

|           |                |            |        |         |         |       |          |         |            |         |         |         |         |         |         |         |         |      |         |         |        |        |       |       |       |      |     |      |      |     |      |    |     |      |     |   |        |     |      |      |     |        |   |   |    |   |     |      |    |   |   |   |   |      |    |   |   |   |   |   |   |   |   |   |   |   |   |   |   |   |   |   |   |   |   |   |   |   |   |   |   |     |     |     |     |   |     |     |     |   |   |   |     |
|-----------|----------------|------------|--------|---------|---------|-------|----------|---------|------------|---------|---------|---------|---------|---------|---------|---------|---------|------|---------|---------|--------|--------|-------|-------|-------|------|-----|------|------|-----|------|----|-----|------|-----|---|--------|-----|------|------|-----|--------|---|---|----|---|-----|------|----|---|---|---|---|------|----|---|---|---|---|---|---|---|---|---|---|---|---|---|---|---|---|---|---|---|---|---|---|---|---|---|---|-----|-----|-----|-----|---|-----|-----|-----|---|---|---|-----|
| CqTPS1    | LDYDGTMPQTSI   | DKKPSQEV   | SI     | LNLSADP | PRNTVFI | VS    | SGRGKDS  | L       | GKWF       | SP      | CKKVG   | AAEHGYF | NRWS    | AEDEW   | ENC     | GQN     | CDF     | GW   | 86      |         |        |        |       |       |       |      |     |      |      |     |      |    |     |      |     |   |        |     |      |      |     |        |   |   |    |   |     |      |    |   |   |   |   |      |    |   |   |   |   |   |   |   |   |   |   |   |   |   |   |   |   |   |   |   |   |   |   |   |   |   |   |     |     |     |     |   |     |     |     |   |   |   |     |
| AtTPS7    | LDYDGTLMQNSI   | NKAPSQEV   | LN     | LDAL    | CEDKNSI | FI    | VS       | SGRGRES | L          | SKWF    | TP      | CKKI    | GI      | AAEHGYF | LKWSG   | SEEW    | ETC     | GQS  | SDF     | GW      | 87     |        |       |       |       |      |     |      |      |     |      |    |     |      |     |   |        |     |      |      |     |        |   |   |    |   |     |      |    |   |   |   |   |      |    |   |   |   |   |   |   |   |   |   |   |   |   |   |   |   |   |   |   |   |   |   |   |   |   |   |   |     |     |     |     |   |     |     |     |   |   |   |     |
| CqTPS3    | LDCCDGTMMQSS   | SVSTNP     | NVEAVK | VLNS    | LCKDS   | KNVVF | LVS      | GKDKRKL | SE         | WFSS    | SCENL   | GI      | AAEHGYF | VR      | YDNDAD  | WEI     | C       | KPI  | SNF     | DW      | 86     |        |       |       |       |      |     |      |      |     |      |    |     |      |     |   |        |     |      |      |     |        |   |   |    |   |     |      |    |   |   |   |   |      |    |   |   |   |   |   |   |   |   |   |   |   |   |   |   |   |   |   |   |   |   |   |   |   |   |   |   |     |     |     |     |   |     |     |     |   |   |   |     |
| CqTPS8    | LLDCDGTMMQSS   | SVSTNP     | NVEAVK | VLNS    | LCKDS   | KNVVF | LVS      | GKDKRKL | SE         | WFSS    | SCENL   | GI      | AAEHGYF | VR      | YDNDAD  | WEI     | C       | KPI  | SNF     | DW      | 87     |        |       |       |       |      |     |      |      |     |      |    |     |      |     |   |        |     |      |      |     |        |   |   |    |   |     |      |    |   |   |   |   |      |    |   |   |   |   |   |   |   |   |   |   |   |   |   |   |   |   |   |   |   |   |   |   |   |   |   |   |     |     |     |     |   |     |     |     |   |   |   |     |
| AtTPS5    | LLDYDGTNVQPGSI | RTTPTRETI  | EI     | LNNLS   | SDPKNI  | VY    | LVS      | GKDRRLT | TE         | WFSS    | CDL     | GL      | GAEHGYF | IR      | PN      | DGTD    | WETS    | SLV  | S       | GFEW    | 87     |        |       |       |       |      |     |      |      |     |      |    |     |      |     |   |        |     |      |      |     |        |   |   |    |   |     |      |    |   |   |   |   |      |    |   |   |   |   |   |   |   |   |   |   |   |   |   |   |   |   |   |   |   |   |   |   |   |   |   |   |     |     |     |     |   |     |     |     |   |   |   |     |
| AtTPS6    | LLDYDDTLMPQGS  | DKRPSKSI   | DI     | LNTLCRD | KGNL    | VFI   | VS       | AKSRET  | LS         | DWFS    | PCEK    | GI      | AAEHGYF | LRLR    | KAVEW   | ENC     | VAA     | VDCS | W       | 87      |        |        |       |       |       |      |     |      |      |     |      |    |     |      |     |   |        |     |      |      |     |        |   |   |    |   |     |      |    |   |   |   |   |      |    |   |   |   |   |   |   |   |   |   |   |   |   |   |   |   |   |   |   |   |   |   |   |   |   |   |   |     |     |     |     |   |     |     |     |   |   |   |     |
| CqTPS2    | LDYDGTI        | VPQTSNNKCP | SP     | SEVI    | SV      | LNAL  | CNDPKNTI | FI      | VS         | SGRGAOL | SE      | W       | SPCQLL  | GI      | AAEHGYF | LRSN    | KAAD    | WESN | ...     | T       | AELDW  | 84     |       |       |       |      |     |      |      |     |      |    |     |      |     |   |        |     |      |      |     |        |   |   |    |   |     |      |    |   |   |   |   |      |    |   |   |   |   |   |   |   |   |   |   |   |   |   |   |   |   |   |   |   |   |   |   |   |   |   |   |     |     |     |     |   |     |     |     |   |   |   |     |
| CqTPS7    | LDYDGTI        | VPQTSNNKCP | SP     | SEVI    | SV      | LNAL  | CNDPKKHN |         |            |         |         |         |         |         |         |         |         |      |         |         |        | 57     |       |       |       |      |     |      |      |     |      |    |     |      |     |   |        |     |      |      |     |        |   |   |    |   |     |      |    |   |   |   |   |      |    |   |   |   |   |   |   |   |   |   |   |   |   |   |   |   |   |   |   |   |   |   |   |   |   |   |   |     |     |     |     |   |     |     |     |   |   |   |     |
| CqTPS4    | LDYDGT         | VVS        | DMSI   | VKTP    | SP      | ELI   | SI       | LNNL    | CNDPKNTVFI | VS      | SGRG    | RDP     | SE      | W       | SPCEK   | GI      | AAEHGYF | L    | RWNQNC  | D       | WEI    | S      | PVT   | ADNDW | 86    |      |     |      |      |     |      |    |     |      |     |   |        |     |      |      |     |        |   |   |    |   |     |      |    |   |   |   |   |      |    |   |   |   |   |   |   |   |   |   |   |   |   |   |   |   |   |   |   |   |   |   |   |   |   |   |   |     |     |     |     |   |     |     |     |   |   |   |     |
| AtTPS8    | FLDYDGT        | LV         | PSSI   | VQDPS   | NEVVS   | VL    | KAL      | CEDP    | PNTVFI     | VS      | SGRGRES | L       | SNWLS   | PCENL   | GI      | AAEHGYF | IR      | WKS  | KDEW    | ETC     | YSP    | TDTEW  | 87    |       |       |      |     |      |      |     |      |    |     |      |     |   |        |     |      |      |     |        |   |   |    |   |     |      |    |   |   |   |   |      |    |   |   |   |   |   |   |   |   |   |   |   |   |   |   |   |   |   |   |   |   |   |   |   |   |   |   |     |     |     |     |   |     |     |     |   |   |   |     |
| AtTPS9    | FLDYDGT        | LV         | PSSI   | I       | KTPNAE  | VL    | SVLKS    | L       | CGDP       | KNTV    | VVS     | GRGWES  | L       | SDWLS   | PCENL   | GI      | AAEHGYF | IR   | WKS     | KDEW    | ETC    | YSS    | AEAEW | 87    |       |      |     |      |      |     |      |    |     |      |     |   |        |     |      |      |     |        |   |   |    |   |     |      |    |   |   |   |   |      |    |   |   |   |   |   |   |   |   |   |   |   |   |   |   |   |   |   |   |   |   |   |   |   |   |   |   |     |     |     |     |   |     |     |     |   |   |   |     |
| AtTPS10   | FLDYDGT        | LV         | PETSI  | VKDP    | SAEVI   | S     | ALKAL    | CS      | DP         | NNTI    | FI      | VS      | SGRKVS  | L       | SEW     | AP      | CENL    | GI   | AAEHGYF | TR      | WNKS   | SD     | WETS  | GLS   | DDLEW | 87   |     |      |      |     |      |    |     |      |     |   |        |     |      |      |     |        |   |   |    |   |     |      |    |   |   |   |   |      |    |   |   |   |   |   |   |   |   |   |   |   |   |   |   |   |   |   |   |   |   |   |   |   |   |   |   |     |     |     |     |   |     |     |     |   |   |   |     |
| CqTPS13   | LLDYDGT        | M          | PQTS   | VNMAP   | TTEV    | LS    | LLNS     | L       | CNDPKNA    | VFI     | VS      | GRSRET  | LS      | KWFS    | ACEK    | GI      | SAEHGYF | TR   | WS      | QNS     | EWESS  | ...    | I     | LGTN  | FEW   | 87   |     |      |      |     |      |    |     |      |     |   |        |     |      |      |     |        |   |   |    |   |     |      |    |   |   |   |   |      |    |   |   |   |   |   |   |   |   |   |   |   |   |   |   |   |   |   |   |   |   |   |   |   |   |   |   |     |     |     |     |   |     |     |     |   |   |   |     |
| AtTPS11   | LLDYDGT        | NMDQ       | DTL    | DKRP    | SD      | DLI   | S        | LLNRL   | CD         | PS      | NL      | VFI     | VS      | SGRKDP  | LS      | KWFS    | CP      | NL   | GI      | SAEHGYF | TR     | WS     | NS    | P     | WETS  | ...  | EL  | PADL | SW   | 87  |      |    |     |      |     |   |        |     |      |      |     |        |   |   |    |   |     |      |    |   |   |   |   |      |    |   |   |   |   |   |   |   |   |   |   |   |   |   |   |   |   |   |   |   |   |   |   |   |   |   |   |     |     |     |     |   |     |     |     |   |   |   |     |
| CqTPS5    | ...            | GDQVKD     | NS     | KLNP    | EL      | KGPL  | S        | VL      | CN         | DS      | NS      | TI      | VI      | LS      | GS      | RRI     | DL      | VNNF | GEYD    | MW      | AAEHGM | FL     | RHTR  | GD    | WKT   | T    | PEL | L    | NLDW | 79  |      |    |     |      |     |   |        |     |      |      |     |        |   |   |    |   |     |      |    |   |   |   |   |      |    |   |   |   |   |   |   |   |   |   |   |   |   |   |   |   |   |   |   |   |   |   |   |   |   |   |   |     |     |     |     |   |     |     |     |   |   |   |     |
| CqTPS10   | ...            | GDQVKD     | NS     | KLNP    | EL      | KGPL  | S        | VL      | CN         | DS      | NS      | TI      | VI      | LS      | GS      | RRI     | DL      | VNNF | GEYD    | MW      | AAEHGM | FL     | RHTR  | GD    | WKT   | T    | PEL | L    | NLDW | 79  |      |    |     |      |     |   |        |     |      |      |     |        |   |   |    |   |     |      |    |   |   |   |   |      |    |   |   |   |   |   |   |   |   |   |   |   |   |   |   |   |   |   |   |   |   |   |   |   |   |   |   |     |     |     |     |   |     |     |     |   |   |   |     |
| CqTPS6    | ...            | LHPEL      | NG     | PLS     | VL      | CN    | PKS      | TI      | VI         | LS      | GS      | RRI     | DL      | DNNF    | GDYD    | MW      | AAEHGM  | FL   | RHTR    | RRG     | D      | WATT   | T     | PEH   | L     | NLDW | 70  |      |      |     |      |    |     |      |     |   |        |     |      |      |     |        |   |   |    |   |     |      |    |   |   |   |   |      |    |   |   |   |   |   |   |   |   |   |   |   |   |   |   |   |   |   |   |   |   |   |   |   |   |   |   |     |     |     |     |   |     |     |     |   |   |   |     |
| CqTPS9    | ...            | LHPEL      | NG     | PLS     | VL      | CN    | PKS      | TI      | VI         | LS      | GS      | RRI     | DL      | DNNF    | GDYD    | MW      | AAEHGM  | FL   | RHTR    | RRG     | D      | WATT   | T     | PEH   | L     | NLDW | 70  |      |      |     |      |    |     |      |     |   |        |     |      |      |     |        |   |   |    |   |     |      |    |   |   |   |   |      |    |   |   |   |   |   |   |   |   |   |   |   |   |   |   |   |   |   |   |   |   |   |   |   |   |   |   |     |     |     |     |   |     |     |     |   |   |   |     |
| AtTPS1    | PVDN           | Q          | RRG    | DQI     | KEND    | L     | NHPEL    | KGPL    | KAL        | CS      | DP      | S       | TTI     | VVLS    | GS      | S       | RS      | VL   | DKNF    | GEYD    | MW     | AAENGM | FL    | R     | LTN   | GEW  | ATT | T    | PEH  | L   | NNEW | 87 |     |      |     |   |        |     |      |      |     |        |   |   |    |   |     |      |    |   |   |   |   |      |    |   |   |   |   |   |   |   |   |   |   |   |   |   |   |   |   |   |   |   |   |   |   |   |   |   |   |     |     |     |     |   |     |     |     |   |   |   |     |
| AtTPS2    | ...            | LGF        | F      | GT      | L       | AE    | P        | N       | S          | T       | G       | T       | K       | E       | ...     | MDL     | KL      | NPEL | K       | ETL     | KAL    | CND    | P     | TT    | V     | V    | LS  | RS   | G    | KNI | L    | N  | KNF | GESN | I   | W | AAENGM | F   | E    | KQTT | GEW | T      | N | P | Q  | N | V   | NLDW | 90 |   |   |   |   |      |    |   |   |   |   |   |   |   |   |   |   |   |   |   |   |   |   |   |   |   |   |   |   |   |   |   |   |     |     |     |     |   |     |     |     |   |   |   |     |
| AtTPS3    | ...            | I          | L      | G       | F       | Y     | G        | T       | L          | T       | E       | P       | R       | N       | S       | L       | S       | K    | E       | ...     | MDL    | XL     | NPEL  | K     | ETL   | KAL  | CND | P    | TT   | V   | V    | LS | RS  | G    | KNI | L | N      | KNF | GEYK | I    | W   | AAENGM | F | L | KH | T | EEW | T    | N  | P | Q | N | V | NLDW | 91 |   |   |   |   |   |   |   |   |   |   |   |   |   |   |   |   |   |   |   |   |   |   |   |   |   |   |     |     |     |     |   |     |     |     |   |   |   |     |
| AtTPS4    | ...            | I          | L      | G       | F       | Y     | G        | T       | L          | T       | E       | P       | R       | N       | S       | L       | S       | K    | E       | ...     | MDL    | XL     | NPEL  | K     | ETL   | KAL  | CND | P    | TT   | V   | V    | LS | RS  | G    | KNI | L | N      | KNF | GEYK | I    | W   | AAENGM | F | L | KH | T | EEW | T    | N  | P | Q | N | V | NLDW | 91 |   |   |   |   |   |   |   |   |   |   |   |   |   |   |   |   |   |   |   |   |   |   |   |   |   |   |     |     |     |     |   |     |     |     |   |   |   |     |
| CqTPS11   | ...            | I          | L      | G       | F       | Y     | G        | T       | L          | T       | E       | P       | R       | N       | S       | L       | S       | K    | E       | ...     | MDL    | XL     | NPEL  | K     | ETL   | KAL  | CND | P    | TT   | V   | V    | LS | RS  | G    | KNI | L | N      | KNF | GEYK | I    | W   | AAENGM | F | L | KH | T | EEW | T    | N  | P | Q | N | V | NLDW | 91 |   |   |   |   |   |   |   |   |   |   |   |   |   |   |   |   |   |   |   |   |   |   |   |   |   |   |     |     |     |     |   |     |     |     |   |   |   |     |
| CqTPS12   | ...            | I          | L      | G       | F       | Y     | G        | T       | L          | T       | E       | P       | R       | N       | S       | L       | S       | K    | E       | ...     | MDL    | XL     | NPEL  | K     | ETL   | KAL  | CND | P    | TT   | V   | V    | LS | RS  | G    | KNI | L | N      | KNF | GEYK | I    | W   | AAENGM | F | L | KH | T | EEW | T    | N  | P | Q | N | V | NLDW | 91 |   |   |   |   |   |   |   |   |   |   |   |   |   |   |   |   |   |   |   |   |   |   |   |   |   |   |     |     |     |     |   |     |     |     |   |   |   |     |
| Consensus | ...            | I          | L      | G       | F       | Y     | G        | T       | L          | T       | E       | P       | R       | N       | S       | L       | S       | K    | E       | ...     | MDL    | XL     | NPEL  | K     | ETL   | KAL  | CND | P    | TT   | V   | V    | LS | RS  | G    | KNI | L | N      | KNF | GEYK | I    | W   | AAENGM | F | L | KH | T | EEW | T    | N  | P | Q | N | V | NLDW | 91 |   |   |   |   |   |   |   |   |   |   |   |   |   |   |   |   |   |   |   |   |   |   |   |   |   |   |     |     |     |     |   |     |     |     |   |   |   |     |
| CqTPS1    | VQI            | AEP        | V      | N       | K       | L     | Y        | T       | E          | A       | D       | G       | S       | F       | I       | E       | T       | K    | E       | S       | A      | L      | V     | Y     | H     | R    | D   | A    | D    | P   | G    | F  | G   | S    | C   | A | K      | E   | M    | L    | D   | E      | L | E | S  | V | L   | A    | N  | E | P | V | S | V    | K  | S | Q | H | I | V | E | N | K | P | C | G | V | S | K | G | L | V | A | E | K | I | F | T | K | M | A | E   | S   | G   | ... | K | H   | A   | 181 |   |   |   |     |
| AtTPS7    | MQI            | VEP        | V      | N       | K       | L     | Y        | T       | E          | A       | D       | G       | S       | F       | I       | E       | T       | K    | E       | S       | A      | L      | V     | Y     | H     | R    | D   | A    | D    | P   | G    | F  | G   | S    | C   | A | K      | E   | M    | L    | D   | E      | L | E | S  | V | L   | A    | N  | E | P | V | S | V    | K  | S | Q | H | I | V | E | N | K | P | C | G | V | S | K | G | L | V | A | E | K | I | F | T | K | M | A | E   | S   | G   | ... | K | H   | A   | 182 |   |   |   |     |
| CqTPS3    | KHVAEP         | V          | N      | K       | L       | Y     | T        | E       | A          | D       | G       | S       | F       | I       | E       | T       | K       | E    | S       | A       | L      | V      | Y     | H     | R     | D    | A   | D    | P    | G   | F    | G  | S   | C    | A   | K | E      | M   | L    | D    | E   | L      | E | S | V  | L | A   | N    | E  | P | V | S | V | K    | S  | Q | H | I | V | E | N | K | P | C | G | V | S | K | G | L | V | A | E | K | I | F | T | K | M | A | E | S   | G   | ... | K   | H | A   | 181 |     |   |   |   |     |
| CqTPS8    | KHVAEP         | V          | N      | K       | L       | Y     | T        | E       | A          | D       | G       | S       | F       | I       | E       | T       | K       | E    | S       | A       | L      | V      | Y     | H     | R     | D    | A   | D    | P    | G   | F    | G  | S   | C    | A   | K | E      | M   | L    | D    | E   | L      | E | S | V  | L | A   | N    | E  | P | V | S | V | K    | S  | Q | H | I | V | E | N | K | P | C | G | V | S | K | G | L | V | A | E | K | I | F | T | K | M | A | E | S   | G   | ... | K   | H | A   | 182 |     |   |   |   |     |
| AtTPS5    | KQI            | AEP        | V      | N       | K       | L     | Y        | T       | E          | A       | D       | G       | S       | F       | I       | E       | T       | K    | E       | S       | A      | L      | V     | Y     | H     | R    | D   | A    | D    | P   | G    | F  | G   | S    | C   | A | K      | E   | M    | L    | D   | E      | L | E | S  | V | L   | A    | N  | E | P | V | S | V    | K  | S | Q | H | I | V | E | N | K | P | C | G | V | S | K | G | L | V | A | E | K | I | F | T | K | M | A | E   | S   | G   | ... | K | H   | A   | 182 |   |   |   |     |
| AtTPS6    | KQI            | AEP        | V      | N       | K       | L     | Y        | T       | E          | A       | D       | G       | S       | F       | I       | E       | T       | K    | E       | S       | A      | L      | V     | Y     | H     | R    | D   | A    | D    | P   | G    | F  | G   | S    | C   | A | K      | E   | M    | L    | D   | E      | L | E | S  | V | L   | A    | N  | E | P | V | S | V    | K  | S | Q | H | I | V | E | N | K | P | C | G | V | S | K | G | L | V | A | E | K | I | F | T | K | M | A | E   | S   | G   | ... | K | H   | A   | 182 |   |   |   |     |
| CqTPS2    | KDI            | VEP        | I      | N       | R       | S     | Y        | T       | E          | A       | D       | G       | S       | F       | I       | E       | T       | K    | E       | S       | A      | L      | V     | Y     | H     | R    | D   | A    | D    | P   | G    | F  | G   | S    | C   | A | K      | E   | M    | L    | D   | E      | L | E | S  | V | L   | A    | N  | E | P | V | S | V    | K  | S | Q | H | I | V | E | N | K | P | C | G | V | S | K | G | L | V | A | E | K | I | F | T | K | M | A | E   | S   | G   | ... | K | H   | A   | 182 |   |   |   |     |
| CqTPS7    | KDI            | VEP        | I      | N       | R       | S     | Y        | T       | E          | A       | D       | G       | S       | F       | I       | E       | T       | K    | E       | S       | A      | L      | V     | Y     | H     | R    | D   | A    | D    | P   | G    | F  | G   | S    | C   | A | K      | E   | M    | L    | D   | E      | L | E | S  | V | L   | A    | N  | E | P | V | S | V    | K  | S | Q | H | I | V | E | N | K | P | C | G | V | S | K | G | L | V | A | E | K | I | F | T | K | M | A | E   | S   | G   | ... | K | H   | A   | 182 |   |   |   |     |
| CqTPS4    | KKI            | AEP        | V      | N       | K       | L     | Y        | T       | E          | A       | D       | G       | S       | F       | I       | E       | T       | K    | E       | S       | A      | L      | V     | Y     | H     | R    | D   | A    | D    | P   | G    | F  | G   | S    | C   | A | K      | E   | M    | L    | D   | E      | L | E | S  | V | L   | A    | N  | E | P | V | S | V    | K  | S | Q | H | I | V | E | N | K | P | C | G | V | S | K | G | L | V | A | E | K | I | F | T | K | M | A | E   | S   | G   | ... | K | H   | A   | 182 |   |   |   |     |
| AtTPS8    | RSMVEP         | V          | M      | R       | S       | Y     | N        | E       | A          | D       | G       | S       | F       | I       | E       | T       | K       | E    | S       | A       | L      | V      | Y     | H     | R     | D    | A   | D    | P    | G   | F    | G  | S   | C    | A   | K | E      | M   | L    | D    | E   | L      | E | S | V  | L | A   | N    | E  | P | V | S | V | K    | S  | Q | H | I | V | E | N | K | P | C | G | V | S | K | G | L | V | A | E | K | I | F | T | K | M | A | E | S   | G   | ... | K   | H | A   | 182 |     |   |   |   |     |
| AtTPS9    | KTNVEP         | V          | M      | R       | S       | Y     | N        | E       | A          | D       | G       | S       | F       | I       | E       | T       | K       | E    | S       | A       | L      | V      | Y     | H     | R     | D    | A   | D    | P    | G   | F    | G  | S   | C    | A   | K | E      | M   | L    | D    | E   | L      | E | S | V  | L | A   | N    | E  | P | V | S | V | K    | S  | Q | H | I | V | E | N | K | P | C | G | V | S | K | G | L | V | A | E | K | I | F | T | K | M | A | E | S   | G   | ... | K   | H | A   | 182 |     |   |   |   |     |
| AtTPS10   | KKVVEPI        | N          | R      | L       | Y       | T     | E        | T       | D          | G       | S       | F       | I       | E       | T       | K       | E       | S    | A       | L       | V      | Y      | H     | R     | D     | A    | D   | P    | G    | F   | G    | S  | C   | A    | K   | E | M      | L   | D    | E    | L   | E      | S | V | L  | A | N   | E    | P  | V | S | V | K | S    | Q  | H | I | V | E | N | K | P | C | G | V | S | K | G | L | V | A | E | K | I | F | T | K | M | A | E | S | G   | ... | K   | H   | A | 182 |     |     |   |   |   |     |
| CqTPS13   | KKVVGPI        | N          | E      | L       | Y       | A     | E        | A       | D          | G       | S       | F       | I       | E       | T       | K       | E       | S    | A       | L       | V      | Y      | H     | R     | D     | A    | D   | P    | G    | F   | G    | S  | C   | A    | K   | E | M      | L   | D    | E    | L   | E      | S | V | L  | A | N   | E    | P  | V | S | V | K | S    | Q  | H | I | V | E | N | K | P | C | G | V | S | K | G | L | V | A | E | K | I | F | T | K | M | A | E | S | G   | ... | K   | H   | A | 182 |     |     |   |   |   |     |
| AtTPS11   | KKI            | AKP        | V      | N       | N       | H     | Y        | E       | A          | D       | G       | S       | F       | I       | E       | T       | K       | E    | S       | A       | L      | V      | Y     | H     | R     | D    | A   | D    | P    | G   | F    | G  | S   | C    | A   | K | E      | M   | L    | D    | E   | L      | E | S | V  | L | A   | N    | E  | P | V | S | V | K    | S  | Q | H | I | V | E | N | K | P | C | G | V | S | K | G | L | V | A | E | K | I | F | T | K | M | A | E | S   | G   | ... | K   | H | A   | 182 |     |   |   |   |     |
| CqTPS5    | VPS            | V          | Y      | H       | I       | F     | E        | Y       | F          | K       | E       | R       | T       | P       | R       | S       | T       | I    | E       | L       | R      | D      | S     | L     | V     | N    | Y   | K    | A    | D   | E    | F  | E   | G    | R   | L | C      | A   | R    | D    | M   | L      | Q | L | W  | T | G   | P    | I  | S | N | A | S | V    | E  | V | Q | G | S | R | S | V | E | N | R | P | V | G | T | T | G | S | A | I | D | R | I | L | G | E | I | ... | V   | H   | S   | K | P   | L   | K   | S | P | I | 178 |
| CqTPS10   | VPS            | V          | Y      | H       | I       | F     | E        | Y       |            |         |         |         |         |         |         |         |         |      |         |         |        |        |       |       |       |      |     |      |      |     |      |    |     |      |     |   |        |     |      |      |     |        |   |   |    |   |     |      |    |   |   |   |   |      |    |   |   |   |   |   |   |   |   |   |   |   |   |   |   |   |   |   |   |   |   |   |   |   |   |   |   |     |     |     |     |   |     |     |     |   |   |   |     |

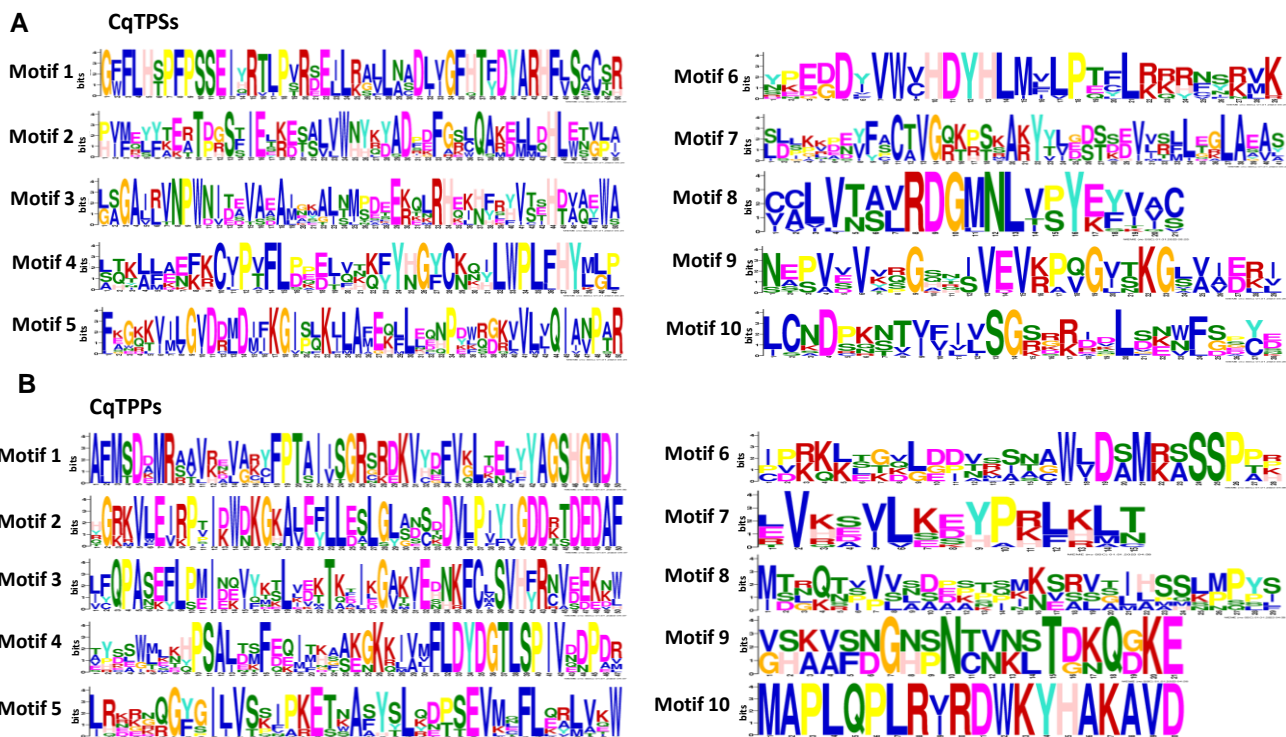

**Supplemental Figure S2.** Sequences of conservative motifs in CqTPS and CqTPP proteins. (A) Sequence analysis of CqTPS protein conserved motifs, color represents different amino acid residues, and larger font sizes represent more frequencies. (B) Sequence analysis of CqTPP protein conserved motifs, color represents different amino acid residues, and larger font sizes represent more frequencies.

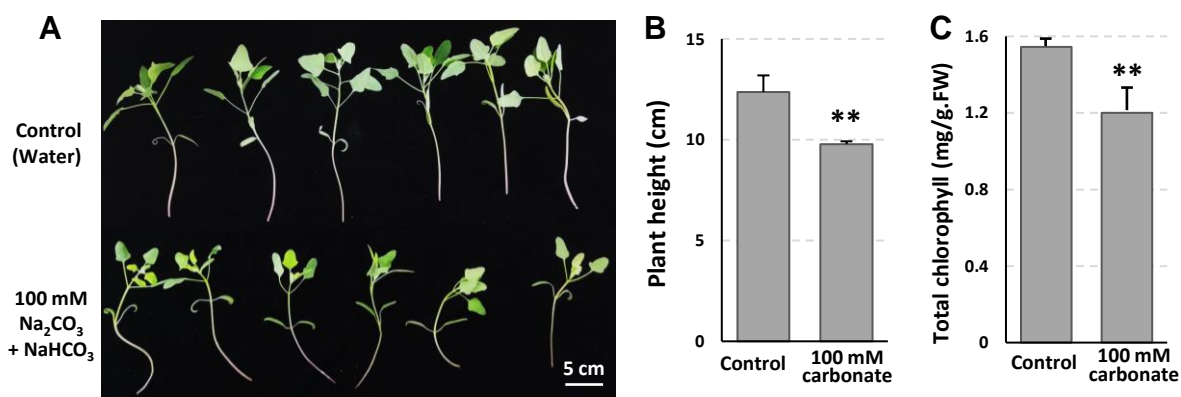

**Supplemental Figure S3.** Saline-alkali stress affected quinoa growth and development. **(A)** Quinoa plants undergone carbonate treatment. Two-week-old quinoa seedlings were treated with a solution containing 100 mM  $\text{Na}_2\text{CO}_3$ : $\text{NaHCO}_3$ =1:9, once every 5 days, three times in total. **(B)** Statistics of plant height in A. **(C)** Statistics of total chlorophyll in quinoa leaves with or without carbonate treatment. \*\*,  $p < 0.01$ .
