# Supplementary material for: Genome-Wide Identification and Analysis of Stress Response of Trehalose-6-Phosphate Synthase and Trehalose-6-Phosphate Phosphatase Genes in Quinoa
Source: MDPI journal article supplement (doi:10.3390/ijms24086950), 2023-04-09
Supplement: s1 [file s1]

**Supplemental Table S5.** Primers used for RT-qPCR.

| Gene ID               | Forward (5'→3')         | Reverse (5'→3')         |
|-----------------------|-------------------------|-------------------------|
| AUR62020068<br>(UBQ9) | CAATGTCTACTACAACGAAGCG  | CAGACTGACCAAACACAAAAGTT |
| AUR62002838           | ACTCAGATACGCAAAATTACGC  | GACCAAGCTTATCTACGAGGAA  |
| AUR62004026           | AATGACACAAATGGAAGGACG   | GAGACTGTGGCTTGAGATAACT  |
| AUR62004476           | GGCGAAGTCTACTCAGAATGAT  | GAAAATCTCGGGAAAACCTAGC  |
| AUR62007199           | GTATTGCAAGAATCAGACCGTC  | CCATCTTCTCAGGCGTAAAATG  |
| AUR62007314           | TGGGGGTATTTAGATCTTGTCG  | ATTGAGTAGGTGCGATATCGAG  |
| AUR62008239           | TGTAATTCCAAACGCAACCTTC  | ACCGAGTTATTACGTGTTTTGC  |
| AUR62012048           | CAAGACAGAGCCTTTTAGGAGA  | CAATTAGCATGGCTCTCAATCC  |
| AUR62012679           | TTTCTTTGTTGACCCAGTGATG  | AAAGTAGAGAACACGCTACACA  |
| AUR62012679           | TTTCTTTGTTGACCCAGTGATG  | AAAGTAGAGAACACGCTACACA  |
| AUR62012986           | TTAATGCCTTCCACCAAAAAGG  | CTGCCATCTTTCTTATCAGCAC  |
| AUR62012986           | TTAATGCCTTCCACCAAAAAGG  | CTGCCATCTTTCTTATCAGCAC  |
| AUR62013843           | GGGATGAACATGCTGTTACATC  | TCAAACCGGAAATCTTGGAAC   |
| AUR62013843           | GGGATGAACATGCTGTTACATC  | TCAAACCGGAAATCTTGGAAC   |
| AUR62018691           | CTATCATGGTGTACGGTCTTA   | GGAGCATCAGAGCTTACACTAT  |
| AUR62020083           | GGCATATGATGTTCTATCCCA   | GAAACAGATCAAAGTCCGTAGC  |
| AUR62020390           | GTGTAGATTTTCATGGAATGGGC | CTTCGTCAATGGAAACCGTATC  |
| AUR62021097           | TGACATGAATGAAGCTTCGAAC  | GTCTTGCTTATAATGGGTACGC  |
| AUR62026544           | GATTTTCCAAGAGATGTGACGG  | GAAATTGCTGTGTTGTGCGAGAT |
| AUR62028315           | CTGCGTGCTTGTCAAAAATAAC  | TCCACAATAAAGACAAATGCCG  |
| AUR62029688           | GCAGATGTAAAGCGAACGTTAT  | GATGTAAACGCAAGGTATCCAC  |
| AUR62034657           | CAAAGCTATTGAAGGCATCTCC  | GCTTGTGTTGGTAAATGGTCTT  |
