# Supplementary material for: Genome-Wide Identification and Analysis of Stress Response of Trehalose-6-Phosphate Synthase and Trehalose-6-Phosphate Phosphatase Genes in Quinoa
Source: MDPI journal article supplement (doi:10.3390/ijms24086950), 2023-04-09
Supplement: s1 [file s1]

**Supplementary Table S1.** Sequences of conservative motifs in CqTPS proteins.

| Motif name | Sequence                                           | Length (aa) |
|------------|----------------------------------------------------|-------------|
| MOTIF1     | GFFLHSPFPSSEIYRTLPRDEJLRALLNADLVGFHTFDYARHFLSCCSR  | 50          |
| MOTIF2     | PVMEYYTERTDGSTIELKESALVWNYKYADPDFGSLQAKELLDHLETVLA | 50          |
| MOTIF3     | LSGAIRVNPWNITEVAEAIGKALNMPDEEKQLRHZKHFRYVSEHDVAEWA | 50          |
| MOTIF4     | LTKLLEEFKCVPVFLPPELVKKFYHGYCKQILWPLFHYMLP          | 41          |
| MOTIF5     | FKGKKVILGVDDMDIFKGISLKJLAFEKLLEZNPDWRGKVVLVQIANPAR | 50          |
| MOTIF6     | YPEDDYVWVHDYHLMVLPTFLRKNSRVK                       | 29          |
| MOTIF7     | LDLKKPEVFACTVGQKPSKAKYYLEDSEVVSLEGLAEAS            | 41          |
| MOTIF8     | CALVTAVRDGMNLVPYEYVAC                              | 21          |
| MOTIF9     | NEPVEVVRGSNIVEVKPQGVTKGLVIERI                      | 29          |
| MOTIF10    | LCNDPKNTIFIVSGSRRDDLSEWFSPYE                       | 28          |

**Supplementary Table S2.** Sequences of conservative motifs in CqTPP proteins.

| Motif name | Sequence                                           | Length (aa) |
|------------|----------------------------------------------------|-------------|
| MOTIF1     | AFMSDDMRAAVREVAKYFPTAIISGRSRDKVYDFVKLTELYYAGSHGMDI | 50          |
| MOTIF2     | HGRKVLEIRPTIDWDKGGKALEFLLESLGLANSDDVLPYIGDDKTDEDAF | 50          |
| MOTIF3     | JFQPASEFLPMIDEVYKSLVEKTKEIKGAKVEDNKFCLSVHFRNVEEKNW | 50          |
| MOTIF4     | AYSSWLLKHPSALDSFEZITKAAKGKKIVMFLDYDGTLSPIVDDPDR    | 41          |
| MOTIF5     | LRKRNQGYGILVSKIPKETNASYSLQDPSEVMEFLZRLVKW          | 50          |
| MOTIF6     | IPKKKTGKLDDVKSNAWLDAMKASSPPK                       | 29          |
| MOTIF7     | EVKEVLKEYPRLKLT                                    | 41          |
| MOTIF8     | MTRQTVVVADEPTPMKSRVAIHSSLPPYS                      | 21          |
| MOTIF9     | GHKVFDGNPNCNKLTDKQGKE                              | 29          |
| MOTIF10    | MAPLQPLRIRDWKYHAKAVD                               | 28          |
