# Supplementary material for: Genome-Wide Identification and Analysis of Stress Response of Trehalose-6-Phosphate Synthase and Trehalose-6-Phosphate Phosphatase Genes in Quinoa
Source: Int J Mol Sci. 2023 Apr 9;24(8):6950. doi: 10.3390/ijms24086950 (PMC10138372; doi:10.3390/ijms24086950)
Supplement: Supplementary file 1 [file ijms-24-06950-s001.zip]

Archive with 5 entries (5 files):
- supplemental figures.pdf
- supplemental table S3.xlsx
- supplemental table S4.xlsx
- supplemental table S5.pdf
- supplemental tables S1 and S2.pdf
