# Supplementary material for: Genome-Wide Identification and Analysis of Stress Response of Trehalose-6-Phosphate Synthase and Trehalose-6-Phosphate Phosphatase Genes in Quinoa
Source: Int J Mol Sci. 2023 Apr 9;24(8):6950. doi: 10.3390/ijms24086950 (PMC10138372; doi:10.3390/ijms24086950)
Supplement: Supplementary file 1 [file ijms-24-06950-s001.zip › supplemental table S3.xlsx]

## Sheet: DAM
Supplemental Table S3. Information of DAMs in Starch and sucrose metabolism pathway.
Index	Q1 (Da)	Q3 (Da)	Molecular weight (Da)	Formula	Ionization model	Compounds	Class I	Class II	CAS	Level	ck-1	ck-2	ck-3	100mM-1	100mM-2	100mM-3	QC01	QC02	QC03	cpd_ID	kegg_map	CK_vs_100mM_VIP	CK_vs_100mM_P-value	CK_vs_100mM_Fold_Change	CK_vs_100mM_Log2FC	CK_vs_100mM_Type
Zmfn000481	535.037	323.026	536.044	C14H22N2O16P2	[M-H]-	Uridine-5'-Diphosphate-D-Xylose	Nucleotides and derivatives	Nucleotides and derivatives	3616-06-6	3	28008.4	32431.8	17372	9	9	9	15763.8	14489.1	14212.1	C00190	ko00520,ko00908,ko01100	1.2436	0.0284464	0.000346989	-11.4928	down
mws0866	259.022	96.9702	260.03	C6H13O9P	[M-H]-	D-Glucose 6-phosphate	Others	Saccharides	56-73-5	1	466332	389037	423910	224175	184193	154663	320534	316835	316380	C00092	ko00500,ko00524,ko00562,ko00998,ko01100,ko01110	1.19624	0.00142716	0.440115	-1.18405	down
MWS2442	259.022	96.9688	260.03	C6H13O9P	[M-H]-	D-Fructose 6-Phosphate	Others	Saccharides	643-13-0	1	347376	340356	351716	156525	123568	146884	271333	270128	262100	C00085	ko00052,ko00500,ko00710,ko01100,ko01110,ko01200	1.22948	0.000914807	0.410773	-1.28359	down
mws4170	179.056	59.0139	180.063	C6H12O6	[M-H]-	D-Glucose	Others	Saccharides	50-99-7	1	4.06972e+06	4.14442e+06	3.96506e+06	2.08011e+06	2.09049e+06	1.8721e+06	2.77568e+06	2.62838e+06	2.6339e+06	C00031	ko00010,ko00030,ko00052,ko00500,ko00520,ko00524,ko00901,ko01100,ko01110,ko02010	1.23763	4.12933e-05	0.496149	-1.01116	down
Lmbn000198	133.014	71.0139	134.022	C4H6O5	[M-H]-	3-Dehydro-L-Threonic Acid	Others	Saccharides	-	1	4.04526e+07	4.45924e+07	4.02971e+07	1.82338e+07	1.84297e+07	1.73426e+07	3.16031e+07	3.43516e+07	3.47292e+07	C03064	ko00053,ko01100	1.23995	0.00227995	0.43087	-1.21468	down
mws1090	259.022	97	260.03	C6H13O9P	[M-H]-	Glucose-1-phosphate	Others	Saccharides	59-56-3	1	522960	377580	414124	117076	144820	167819	401387	375608	339378	C00103	ko00010,ko00040,ko00052,ko00500,ko00520,ko00523,ko00561,ko01100,ko01110,ko01240	1.20647	0.0139013	0.326863	-1.61324	down
pme0500	503.162	323	504.169	C18H32O16	[M-H]-	D-Melezitose	Others	Saccharides	597-12-6	3	134253	171771	177846	57453.1	66095.7	71635.6	63754.5	69494.8	51221.1	C08243	-	1.2102	0.0135144	0.403382	-1.30978	down
pme1261	206.139	76	205.131	C9H19NO4	[M+H]+	D-Panthenol	Others	Saccharides	81-13-0	3	41981.9	46711.5	50179.8	86847	107167	114929	79362	73124.8	53228.9	C05944	ko00770	1.20808	0.0154465	2.22464	1.15357	up
pme2755	222	144	221.09	C8H15NO6	[M+H]+	N-Acetyl-D-glucosamine	Others	Saccharides	7512-17-6	3	612480	574779	512736	138246	178762	241010	558320	496238	738719	C00140	ko00520,ko01100,ko02010	1.19365	0.000801691	0.328247	-1.60715	down
