# Supplementary material for: Genome-Wide Identification and Analysis of Stress Response of Trehalose-6-Phosphate Synthase and Trehalose-6-Phosphate Phosphatase Genes in Quinoa
Source: Int J Mol Sci. 2023 Apr 9;24(8):6950. doi: 10.3390/ijms24086950 (PMC10138372; doi:10.3390/ijms24086950)
Supplement: Supplementary file 1 [file ijms-24-06950-s001.zip › supplemental table S4.xlsx]

## Sheet: Sheet1
Supplemental Table S4. Information of DEGs in Starch and sucrose metabolism pathway.
Gene ID	ck-1_fpkm	ck-2_fpkm	ck-3_fpkm	100mM-1_fpkm	100mM-2_fpkm	100mM-3_fpkm	ck-1_count	ck-2_count	ck-3_count	100mM-1_count	100mM-2_count	100mM-3_count	chr	start	end	strand	gene_name	gene_description	KEGG	KEGG pathway	NR	Swissprot	Tremble	KOG	GO	Pfam	TF-Family	TF-Category	TF-Classification
AUR62002023	8.72	8.23	7.83	7.18	7.5	7.61	343	381	330	354	326	270	C_Quinoa_Scaffold_4480	1360051	1362652	-	AUR62002023	--	K01087 trehalose 6-phosphate phosphatase [EC:3.1.3.12] | (RefSeq) probable trehalose-phosphate phosphatase I (A)	ko00500: Starch and sucrose metabolism; ko01100: Metabolic pathways; ko01110: Biosynthesis of secondary metabolites	probable trehalose-phosphate phosphatase I [Chenopodium quinoa]	TPPJ_ARATH RecName: Full=Probable trehalose-phosphate phosphatase J; Short=AtTPPJ; EC=3.1.3.12; AltName: Full=Trehalose 6-phosphate phosphatase;	A0A803KSL5_CHEQI SubName: Full=Uncharacterized protein {ECO:0000313|EnsemblPlants:AUR62002023-RA:cds};	At5g65140	GO:0005730,nucleolus; GO:0005634,nucleus; GO:0004805,trehalose-phosphatase activity; GO:0046686,response to cadmium ion; GO:0005992,trehalose biosynthetic process; GO:0003674,molecular_function; GO:0003824,catalytic activity; GO:0016787,hydrolase activity; GO:0016788,hydrolase activity, acting on ester bonds; GO:0016791,phosphatase activity; GO:0019203,carbohydrate phosphatase activity; GO:004257…	PF02358.16:Trehalose-phosphatase	--	--	--
AUR62002092	17.95	18.14	17.61	21.35	21.38	20.18	1877	2230	1972	2796	2468	1904	C_Quinoa_Scaffold_4480	2006754	2013924	-	AUR62002092	--	K16055 trehalose 6-phosphate synthase/phosphatase [EC:2.4.1.15 3.1.3.12] | (RefSeq) probable alpha,alpha-trehalose-phosphate synthase [UDP-forming] 7 (A)	ko00500: Starch and sucrose metabolism; ko01100: Metabolic pathways; ko01110: Biosynthesis of secondary metabolites	probable alpha,alpha-trehalose-phosphate synthase [UDP-forming]	TPS7_ARATH RecName: Full=Probable alpha,alpha-trehalose-phosphate synthase [UDP-forming] 7; EC=2.4.1.15; AltName: Full=Trehalose-6-phosphate synthase 7; Short=AtTPS7;	A0A803KST4_CHEQI SubName: Full=Uncharacterized protein {ECO:0000313|EnsemblPlants:AUR62002092-RA:cds};	At1g06410	GO:0005829,cytosol; GO:0016757,transferase activity, transferring glycosyl groups; GO:0016311,dephosphorylation; GO:0003674,molecular_function; GO:0003824,catalytic activity; GO:0016740,transferase activity; GO:0006793,phosphorus metabolic process; GO:0006796,phosphate-containing compound metabolic process; GO:0008150,biological_process; GO:0008152,metabolic process; GO:0009987,cellular process; …	PF00982.21:Glycosyltransferase family 20	--	--	--
AUR62002194	8.27	9.08	8.96	7.1	8.18	7.07	362	467	420	389	395	279	C_Quinoa_Scaffold_4480	3394646	3399205	-	AUR62002194	--	K01087 trehalose 6-phosphate phosphatase [EC:3.1.3.12] | (RefSeq) trehalose-phosphate phosphatase A-like (A)	ko00500: Starch and sucrose metabolism; ko01100: Metabolic pathways; ko01110: Biosynthesis of secondary metabolites	trehalose-phosphate phosphatase A-like [Chenopodium quinoa]	TPPA_ARATH RecName: Full=Trehalose-phosphate phosphatase A; Short=AtTPPA; EC=3.1.3.12; AltName: Full=Trehalose 6-phosphate phosphatase;	A0A803KT36_CHEQI SubName: Full=Uncharacterized protein {ECO:0000313|EnsemblPlants:AUR62002194-RA:cds};	At5g51460	GO:0004805,trehalose-phosphatase activity; GO:0005992,trehalose biosynthetic process; GO:0003674,molecular_function; GO:0003824,catalytic activity; GO:0016787,hydrolase activity; GO:0016788,hydrolase activity, acting on ester bonds; GO:0016791,phosphatase activity; GO:0019203,carbohydrate phosphatase activity; GO:0042578,phosphoric ester hydrolase activity; GO:0005975,carbohydrate metabolic proce…	PF02358.16:Trehalose-phosphatase	--	--	--
AUR62003778	23.28	23.92	23.06	22.53	23.41	22.93	673	813	714	816	747	598	C_Quinoa_Scaffold_2370	4555540	4557764	+	AUR62003778	--	K01087 trehalose 6-phosphate phosphatase [EC:3.1.3.12] | (RefSeq) probable trehalose-phosphate phosphatase I (A)	ko00500: Starch and sucrose metabolism; ko01100: Metabolic pathways; ko01110: Biosynthesis of secondary metabolites	probable trehalose-phosphate phosphatase I [Chenopodium quinoa]	TPPJ_ARATH RecName: Full=Probable trehalose-phosphate phosphatase J; Short=AtTPPJ; EC=3.1.3.12; AltName: Full=Trehalose 6-phosphate phosphatase;	A0A803KXL9_CHEQI SubName: Full=Uncharacterized protein {ECO:0000313|EnsemblPlants:AUR62003778-RA:cds};	At5g65140	GO:0005730,nucleolus; GO:0005634,nucleus; GO:0004805,trehalose-phosphatase activity; GO:0046686,response to cadmium ion; GO:0005992,trehalose biosynthetic process; GO:0003674,molecular_function; GO:0003824,catalytic activity; GO:0016787,hydrolase activity; GO:0016788,hydrolase activity, acting on ester bonds; GO:0016791,phosphatase activity; GO:0019203,carbohydrate phosphatase activity; GO:004257…	PF02358.16:Trehalose-phosphatase	--	--	--
AUR62004476	9.18	9.75	9.25	2.73	2.14	2.38	381	476	411	142	98	89	C_Quinoa_Scaffold_4250	3542128	3550902	-	AUR62004476	--	K01087 trehalose 6-phosphate phosphatase [EC:3.1.3.12] | (RefSeq) probable trehalose-phosphate phosphatase C isoform X1 (A)	ko00500: Starch and sucrose metabolism; ko01100: Metabolic pathways; ko01110: Biosynthesis of secondary metabolites	probable trehalose-phosphate phosphatase C isoform X1 [Chenopodium quinoa]	TPPH_ARATH RecName: Full=Probable trehalose-phosphate phosphatase H; Short=AtTPPH; EC=3.1.3.12; AltName: Full=Trehalose 6-phosphate phosphatase;	A0A803KZL6_CHEQI SubName: Full=Uncharacterized protein {ECO:0000313|EnsemblPlants:AUR62004476-RA:cds};	At1g22210	GO:0005829,cytosol; GO:0005634,nucleus; GO:0004805,trehalose-phosphatase activity; GO:0005992,trehalose biosynthetic process; GO:0003674,molecular_function; GO:0003824,catalytic activity; GO:0016787,hydrolase activity; GO:0016788,hydrolase activity, acting on ester bonds; GO:0016791,phosphatase activity; GO:0019203,carbohydrate phosphatase activity; GO:0042578,phosphoric ester hydrolase activity;…	PF02358.16:Trehalose-phosphatase	--	--	--
AUR62005352	10.19	10.53	10.44	13.72	13	12.73	970	1179	1065	1637	1367	1094	C_Quinoa_Scaffold_1214	997240	1004591	-	AUR62005352	--	K16055 trehalose 6-phosphate synthase/phosphatase [EC:2.4.1.15 3.1.3.12] | (RefSeq) probable alpha,alpha-trehalose-phosphate synthase [UDP-forming] 9 (A)	ko00500: Starch and sucrose metabolism; ko01100: Metabolic pathways; ko01110: Biosynthesis of secondary metabolites	probable alpha,alpha-trehalose-phosphate synthase [UDP-forming]	TPS9_ARATH RecName: Full=Probable alpha,alpha-trehalose-phosphate synthase [UDP-forming] 9; EC=2.4.1.15; AltName: Full=Trehalose-6-phosphate synthase 9; Short=AtTPS9;	A0A803L0G4_CHEQI SubName: Full=Uncharacterized protein {ECO:0000313|EnsemblPlants:AUR62005352-RA:cds};	At1g23870	GO:0005829,cytosol; GO:0016757,transferase activity, transferring glycosyl groups; GO:0016311,dephosphorylation; GO:0003674,molecular_function; GO:0003824,catalytic activity; GO:0016740,transferase activity; GO:0006793,phosphorus metabolic process; GO:0006796,phosphate-containing compound metabolic process; GO:0008150,biological_process; GO:0008152,metabolic process; GO:0009987,cellular process; …	PF00982.21:Glycosyltransferase family 20	--	--	--
AUR62006139	0.02	0.1	0.19	0.05	0.04	0.05	1	5	9	3	2	2	C_Quinoa_Scaffold_1001	2668322	2671355	+	AUR62006139	--	K01087 trehalose 6-phosphate phosphatase [EC:3.1.3.12] | (RefSeq) probable trehalose-phosphate phosphatase 7 (A)	ko00500: Starch and sucrose metabolism; ko01100: Metabolic pathways; ko01110: Biosynthesis of secondary metabolites	probable trehalose-phosphate phosphatase 7 [Chenopodium quinoa]	TPP7_ORYSJ RecName: Full=Probable trehalose-phosphate phosphatase 7; Short=OsTPP7; EC=3.1.3.12; AltName: Full=Trehalose 6-phosphate phosphatase;	A0A803L2Q0_CHEQI SubName: Full=Uncharacterized protein {ECO:0000313|EnsemblPlants:AUR62006139-RA:cds};	At1g78090	GO:0004805,trehalose-phosphatase activity; GO:0005992,trehalose biosynthetic process; GO:0003674,molecular_function; GO:0003824,catalytic activity; GO:0016787,hydrolase activity; GO:0016788,hydrolase activity, acting on ester bonds; GO:0016791,phosphatase activity; GO:0019203,carbohydrate phosphatase activity; GO:0042578,phosphoric ester hydrolase activity; GO:0005975,carbohydrate metabolic proce…	PF02358.16:Trehalose-phosphatase	--	--	--
AUR62007314	10.58	10.87	11	4.05	4.08	4.19	992	1198	1104	475	422	354	C_Quinoa_Scaffold_1971	3942433	3949016	-	AUR62007314	--	K16055 trehalose 6-phosphate synthase/phosphatase [EC:2.4.1.15 3.1.3.12] | (RefSeq) alpha,alpha-trehalose-phosphate synthase [UDP-forming] 5-like (A)	ko00500: Starch and sucrose metabolism; ko01100: Metabolic pathways; ko01110: Biosynthesis of secondary metabolites	alpha,alpha-trehalose-phosphate synthase [UDP-forming]	TPS5_ARATH RecName: Full=Alpha,alpha-trehalose-phosphate synthase [UDP-forming] 5; EC=2.4.1.15; AltName: Full=Trehalose-6-phosphate synthase 5; Short=AtTPS5;	A0A803L625_CHEQI SubName: Full=Uncharacterized protein {ECO:0000313|EnsemblPlants:AUR62007314-RA:cds};	At4g17770	GO:0005829,cytosol; GO:0016757,transferase activity, transferring glycosyl groups; GO:0016311,dephosphorylation; GO:0003674,molecular_function; GO:0003824,catalytic activity; GO:0016740,transferase activity; GO:0006793,phosphorus metabolic process; GO:0006796,phosphate-containing compound metabolic process; GO:0008150,biological_process; GO:0008152,metabolic process; GO:0009987,cellular process; …	PF00982.21:Glycosyltransferase family 20	--	--	--
AUR62007476	1.63	1.73	1.78	1.74	1.79	2.09	89	111	104	119	108	103	C_Quinoa_Scaffold_1971	5646732	5652916	-	AUR62007476	--	K01087 trehalose 6-phosphate phosphatase [EC:3.1.3.12] | (RefSeq) probable trehalose-phosphate phosphatase F (A)	ko00500: Starch and sucrose metabolism; ko01100: Metabolic pathways; ko01110: Biosynthesis of secondary metabolites	probable trehalose-phosphate phosphatase F [Chenopodium quinoa]	TPPG_ARATH RecName: Full=Probable trehalose-phosphate phosphatase G; Short=AtTPPG; EC=3.1.3.12; AltName: Full=Trehalose 6-phosphate phosphatase; AltName: Full=Trehalose-phosphate phosphatase 6;	A0A803L6I7_CHEQI SubName: Full=Uncharacterized protein {ECO:0000313|EnsemblPlants:AUR62007476-RA:cds};	At4g22590	GO:0004805,trehalose-phosphatase activity; GO:0005992,trehalose biosynthetic process; GO:0003674,molecular_function; GO:0003824,catalytic activity; GO:0016787,hydrolase activity; GO:0016788,hydrolase activity, acting on ester bonds; GO:0016791,phosphatase activity; GO:0019203,carbohydrate phosphatase activity; GO:0042578,phosphoric ester hydrolase activity; GO:0005975,carbohydrate metabolic proce…	PF02358.16:Trehalose-phosphatase	--	--	--
AUR62008239	13.13	13.1	12.8	44.04	44.35	44.68	1362	1599	1423	5726	5081	4183	C_Quinoa_Scaffold_3422	2052194	2059826	+	AUR62008239	--	K16055 trehalose 6-phosphate synthase/phosphatase [EC:2.4.1.15 3.1.3.12] | (RefSeq) probable alpha,alpha-trehalose-phosphate synthase [UDP-forming] 9 isoform X1 (A)	ko00500: Starch and sucrose metabolism; ko01100: Metabolic pathways; ko01110: Biosynthesis of secondary metabolites	probable alpha,alpha-trehalose-phosphate synthase [UDP-forming]	TPS9_ARATH RecName: Full=Probable alpha,alpha-trehalose-phosphate synthase [UDP-forming] 9; EC=2.4.1.15; AltName: Full=Trehalose-6-phosphate synthase 9; Short=AtTPS9;	A0A803L8Q0_CHEQI SubName: Full=Uncharacterized protein {ECO:0000313|EnsemblPlants:AUR62008239-RA:cds};	At1g23870	GO:0005829,cytosol; GO:0016757,transferase activity, transferring glycosyl groups; GO:0016311,dephosphorylation; GO:0003674,molecular_function; GO:0003824,catalytic activity; GO:0016740,transferase activity; GO:0006793,phosphorus metabolic process; GO:0006796,phosphate-containing compound metabolic process; GO:0008150,biological_process; GO:0008152,metabolic process; GO:0009987,cellular process; …	PF00982.21:Glycosyltransferase family 20	--	--	--
AUR62013953	1.26	1.21	1.24	0.85	0.88	0.92	132	150	140	112	102	87	C_Quinoa_Scaffold_3035	858836	875850	-	AUR62013953	--	K16055 trehalose 6-phosphate synthase/phosphatase [EC:2.4.1.15 3.1.3.12] | (RefSeq) alpha,alpha-trehalose-phosphate synthase [UDP-forming] 1-like (A)	ko00500: Starch and sucrose metabolism; ko01100: Metabolic pathways; ko01110: Biosynthesis of secondary metabolites	alpha,alpha-trehalose-phosphate synthase [UDP-forming]	TPS1_ARATH RecName: Full=Alpha,alpha-trehalose-phosphate synthase [UDP-forming] 1; EC=2.4.1.15; AltName: Full=Trehalose-6-phosphate synthase 1; Short=AtTPS1;	A0A803LJ06_CHEQI SubName: Full=Uncharacterized protein {ECO:0000313|EnsemblPlants:AUR62013953-RA:cds};	At1g78580	GO:0005618,cell wall; GO:0005829,cytosol; GO:0005576,extracellular region; GO:0005773,vacuole; GO:0003825,alpha,alpha-trehalose-phosphate synthase (UDP-forming) activity; GO:0051301,cell division; GO:0009793,embryo development ending in seed dormancy; GO:0009832,plant-type cell wall biogenesis; GO:0010182,sugar mediated signaling pathway; GO:0005991,trehalose metabolic process; GO:0003674,molecul…	PF00982.21:Glycosyltransferase family 20	--	--	--
AUR62013957	13.93	14.34	13.54	8.46	7.85	7.94	1295	1568	1348	985	806	666	C_Quinoa_Scaffold_3035	1012080	1026861	+	AUR62013957	--	K16055 trehalose 6-phosphate synthase/phosphatase [EC:2.4.1.15 3.1.3.12] | (RefSeq) alpha,alpha-trehalose-phosphate synthase [UDP-forming] 1-like (A)	ko00500: Starch and sucrose metabolism; ko01100: Metabolic pathways; ko01110: Biosynthesis of secondary metabolites	alpha,alpha-trehalose-phosphate synthase [UDP-forming]	TPS1_ARATH RecName: Full=Alpha,alpha-trehalose-phosphate synthase [UDP-forming] 1; EC=2.4.1.15; AltName: Full=Trehalose-6-phosphate synthase 1; Short=AtTPS1;	A0A803LW06_CHEQI SubName: Full=Uncharacterized protein {ECO:0000313|EnsemblPlants:AUR62019657-RA:cds};	At1g78580	GO:0005618,cell wall; GO:0005829,cytosol; GO:0005576,extracellular region; GO:0005773,vacuole; GO:0003825,alpha,alpha-trehalose-phosphate synthase (UDP-forming) activity; GO:0051301,cell division; GO:0009793,embryo development ending in seed dormancy; GO:0009832,plant-type cell wall biogenesis; GO:0010182,sugar mediated signaling pathway; GO:0005991,trehalose metabolic process; GO:0003674,molecul…	PF00982.21:Glycosyltransferase family 20	--	--	--
AUR62014005	17.57	18.03	17.31	22.56	21.73	21.77	1613	1946	1702	2594	2202	1803	C_Quinoa_Scaffold_3035	2206377	2210382	-	AUR62014005	--	K16055 trehalose 6-phosphate synthase/phosphatase [EC:2.4.1.15 3.1.3.12] | (RefSeq) LOW QUALITY PROTEIN: probable alpha,alpha-trehalose-phosphate synthase [UDP-forming] 9 (A)	ko00500: Starch and sucrose metabolism; ko01100: Metabolic pathways; ko01110: Biosynthesis of secondary metabolites	LOW QUALITY PROTEIN: probable alpha,alpha-trehalose-phosphate synthase [UDP-forming]	TPS9_ARATH RecName: Full=Probable alpha,alpha-trehalose-phosphate synthase [UDP-forming] 9; EC=2.4.1.15; AltName: Full=Trehalose-6-phosphate synthase 9; Short=AtTPS9;	A0A803LJ58_CHEQI SubName: Full=Uncharacterized protein {ECO:0000313|EnsemblPlants:AUR62014005-RA:cds};	At1g23870	GO:0005829,cytosol; GO:0016757,transferase activity, transferring glycosyl groups; GO:0016311,dephosphorylation; GO:0003674,molecular_function; GO:0003824,catalytic activity; GO:0016740,transferase activity; GO:0006793,phosphorus metabolic process; GO:0006796,phosphate-containing compound metabolic process; GO:0008150,biological_process; GO:0008152,metabolic process; GO:0009987,cellular process; …	PF00982.21:Glycosyltransferase family 20	--	--	--
AUR62015517	5	4.76	4.75	5.14	4.58	4.82	292	327	297	376	295	254	C_Quinoa_Scaffold_2751	7485997	7489524	+	AUR62015517	--	K01087 trehalose 6-phosphate phosphatase [EC:3.1.3.12] | (RefSeq) trehalose-phosphate phosphatase A-like (A)	ko00500: Starch and sucrose metabolism; ko01100: Metabolic pathways; ko01110: Biosynthesis of secondary metabolites	trehalose-phosphate phosphatase A-like [Chenopodium quinoa]	TPPA_ARATH RecName: Full=Trehalose-phosphate phosphatase A; Short=AtTPPA; EC=3.1.3.12; AltName: Full=Trehalose 6-phosphate phosphatase;	A0A803LMK6_CHEQI SubName: Full=Uncharacterized protein {ECO:0000313|EnsemblPlants:AUR62015517-RA:cds};	At5g51460	GO:0004805,trehalose-phosphatase activity; GO:0005992,trehalose biosynthetic process; GO:0003674,molecular_function; GO:0003824,catalytic activity; GO:0016787,hydrolase activity; GO:0016788,hydrolase activity, acting on ester bonds; GO:0016791,phosphatase activity; GO:0019203,carbohydrate phosphatase activity; GO:0042578,phosphoric ester hydrolase activity; GO:0005975,carbohydrate metabolic proce…	PF02358.16:Trehalose-phosphatase	--	--	--
AUR62018691	10	9.18	9.15	4.11	3.92	3.77	958	1034	939	493	415	326	C_Quinoa_Scaffold_1817	914067	920163	+	AUR62018691	--	K16055 trehalose 6-phosphate synthase/phosphatase [EC:2.4.1.15 3.1.3.12] | (RefSeq) alpha,alpha-trehalose-phosphate synthase [UDP-forming] 5-like (A)	ko00500: Starch and sucrose metabolism; ko01100: Metabolic pathways; ko01110: Biosynthesis of secondary metabolites	alpha,alpha-trehalose-phosphate synthase [UDP-forming]	TPS5_ARATH RecName: Full=Alpha,alpha-trehalose-phosphate synthase [UDP-forming] 5; EC=2.4.1.15; AltName: Full=Trehalose-6-phosphate synthase 5; Short=AtTPS5;	A0A803LTZ7_CHEQI SubName: Full=Uncharacterized protein {ECO:0000313|EnsemblPlants:AUR62018691-RA:cds};	At4g17770	GO:0005829,cytosol; GO:0016757,transferase activity, transferring glycosyl groups; GO:0016311,dephosphorylation; GO:0003674,molecular_function; GO:0003824,catalytic activity; GO:0016740,transferase activity; GO:0006793,phosphorus metabolic process; GO:0006796,phosphate-containing compound metabolic process; GO:0008150,biological_process; GO:0008152,metabolic process; GO:0009987,cellular process; …	PF00982.21:Glycosyltransferase family 20	--	--	--
AUR62018916	6.18	5.87	6.08	3.86	3.76	4.03	280	313	295	219	188	165	C_Quinoa_Scaffold_3876	327982	331296	-	AUR62018916	--	K01087 trehalose 6-phosphate phosphatase [EC:3.1.3.12] | (RefSeq) probable trehalose-phosphate phosphatase D (A)	ko00500: Starch and sucrose metabolism; ko01100: Metabolic pathways; ko01110: Biosynthesis of secondary metabolites	probable trehalose-phosphate phosphatase D [Chenopodium quinoa]	TPPD_ARATH RecName: Full=Probable trehalose-phosphate phosphatase D; Short=AtTPPD; EC=3.1.3.12; AltName: Full=Trehalose 6-phosphate phosphatase;	A0A803LUM2_CHEQI SubName: Full=Uncharacterized protein {ECO:0000313|EnsemblPlants:AUR62018916-RA:cds};	At1g35910	GO:0009507,chloroplast; GO:0015927,trehalase activity; GO:0004805,trehalose-phosphatase activity; GO:0006970,response to osmotic stress; GO:0006979,response to oxidative stress; GO:0009651,response to salt stress; GO:0005992,trehalose biosynthetic process; GO:0003674,molecular_function; GO:0003824,catalytic activity; GO:0004553,hydrolase activity, hydrolyzing O-glycosyl compounds; GO:0016787,hydr…	PF02358.16:Trehalose-phosphatase	--	--	--
AUR62019657	14.06	14.16	13.45	8.31	8.37	7.8	1330	1575	1363	985	874	666	C_Quinoa_Scaffold_2127	7449003	7470166	+	AUR62019657	--	K16055 trehalose 6-phosphate synthase/phosphatase [EC:2.4.1.15 3.1.3.12] | (RefSeq) alpha,alpha-trehalose-phosphate synthase [UDP-forming] 1-like (A)	ko00500: Starch and sucrose metabolism; ko01100: Metabolic pathways; ko01110: Biosynthesis of secondary metabolites	alpha,alpha-trehalose-phosphate synthase [UDP-forming]	TPS1_ARATH RecName: Full=Alpha,alpha-trehalose-phosphate synthase [UDP-forming] 1; EC=2.4.1.15; AltName: Full=Trehalose-6-phosphate synthase 1; Short=AtTPS1;	A0A803LW06_CHEQI SubName: Full=Uncharacterized protein {ECO:0000313|EnsemblPlants:AUR62019657-RA:cds};	At1g78580	GO:0005618,cell wall; GO:0005829,cytosol; GO:0005576,extracellular region; GO:0005773,vacuole; GO:0003825,alpha,alpha-trehalose-phosphate synthase (UDP-forming) activity; GO:0051301,cell division; GO:0009793,embryo development ending in seed dormancy; GO:0009832,plant-type cell wall biogenesis; GO:0010182,sugar mediated signaling pathway; GO:0005991,trehalose metabolic process; GO:0003674,molecul…	PF00982.21:Glycosyltransferase family 20	--	--	--
AUR62019658	1.15	0.82	0.94	0.98	0.82	1.21	96	81	84	103	76	91	C_Quinoa_Scaffold_2127	7636979	7658893	+	AUR62019658	--	K16055 trehalose 6-phosphate synthase/phosphatase [EC:2.4.1.15 3.1.3.12] | (RefSeq) alpha,alpha-trehalose-phosphate synthase [UDP-forming] 1-like (A)	ko00500: Starch and sucrose metabolism; ko01100: Metabolic pathways; ko01110: Biosynthesis of secondary metabolites	alpha,alpha-trehalose-phosphate synthase [UDP-forming]	TPS1_ARATH RecName: Full=Alpha,alpha-trehalose-phosphate synthase [UDP-forming] 1; EC=2.4.1.15; AltName: Full=Trehalose-6-phosphate synthase 1; Short=AtTPS1;	A0A803LW07_CHEQI SubName: Full=Uncharacterized protein {ECO:0000313|EnsemblPlants:AUR62019658-RA:cds};	At1g78580	GO:0005618,cell wall; GO:0005829,cytosol; GO:0005576,extracellular region; GO:0005773,vacuole; GO:0003825,alpha,alpha-trehalose-phosphate synthase (UDP-forming) activity; GO:0051301,cell division; GO:0009793,embryo development ending in seed dormancy; GO:0009832,plant-type cell wall biogenesis; GO:0010182,sugar mediated signaling pathway; GO:0005991,trehalose metabolic process; GO:0003674,molecul…	PF00982.21:Glycosyltransferase family 20	--	--	--
AUR62023475	0.98	1.19	0.93	0.56	0.54	0.75	39	56	40	28	24	27	C_Quinoa_Scaffold_1606	414991	423431	+	AUR62023475	--	K01087 trehalose 6-phosphate phosphatase [EC:3.1.3.12] | (RefSeq) probable trehalose-phosphate phosphatase C (A)	ko00500: Starch and sucrose metabolism; ko01100: Metabolic pathways; ko01110: Biosynthesis of secondary metabolites	probable trehalose-phosphate phosphatase C [Chenopodium quinoa]	TPPH_ARATH RecName: Full=Probable trehalose-phosphate phosphatase H; Short=AtTPPH; EC=3.1.3.12; AltName: Full=Trehalose 6-phosphate phosphatase;	A0A803M4V2_CHEQI SubName: Full=Uncharacterized protein {ECO:0000313|EnsemblPlants:AUR62023475-RA:cds};	At1g22210	GO:0005829,cytosol; GO:0005634,nucleus; GO:0004805,trehalose-phosphatase activity; GO:0005992,trehalose biosynthetic process; GO:0003674,molecular_function; GO:0003824,catalytic activity; GO:0016787,hydrolase activity; GO:0016788,hydrolase activity, acting on ester bonds; GO:0016791,phosphatase activity; GO:0019203,carbohydrate phosphatase activity; GO:0042578,phosphoric ester hydrolase activity;…	PF02358.16:Trehalose-phosphatase	--	--	--
AUR62027638	0	0	0	0	0.01	0	0	0	0	0	1	0	C_Quinoa_Scaffold_1125	5349314	5357219	+	AUR62027638	--	K16055 trehalose 6-phosphate synthase/phosphatase [EC:2.4.1.15 3.1.3.12] | (RefSeq) alpha,alpha-trehalose-phosphate synthase [UDP-forming] 1-like isoform X1 (A)	ko00500: Starch and sucrose metabolism; ko01100: Metabolic pathways; ko01110: Biosynthesis of secondary metabolites	alpha,alpha-trehalose-phosphate synthase [UDP-forming]	TPS1_ARATH RecName: Full=Alpha,alpha-trehalose-phosphate synthase [UDP-forming] 1; EC=2.4.1.15; AltName: Full=Trehalose-6-phosphate synthase 1; Short=AtTPS1;	A0A803MDU5_CHEQI SubName: Full=Uncharacterized protein {ECO:0000313|EnsemblPlants:AUR62027638-RA:cds};	At1g78580	GO:0005618,cell wall; GO:0005829,cytosol; GO:0005576,extracellular region; GO:0005773,vacuole; GO:0003825,alpha,alpha-trehalose-phosphate synthase (UDP-forming) activity; GO:0051301,cell division; GO:0009793,embryo development ending in seed dormancy; GO:0009832,plant-type cell wall biogenesis; GO:0010182,sugar mediated signaling pathway; GO:0005991,trehalose metabolic process; GO:0003674,molecul…	PF00982.21:Glycosyltransferase family 20	--	--	--
AUR62027730	10.55	9.6	10.16	5.89	6.6	6.22	453	485	467	317	313	241	C_Quinoa_Scaffold_3784	988017	990537	+	AUR62027730	--	K01087 trehalose 6-phosphate phosphatase [EC:3.1.3.12] | (RefSeq) probable trehalose-phosphate phosphatase D (A)	ko00500: Starch and sucrose metabolism; ko01100: Metabolic pathways; ko01110: Biosynthesis of secondary metabolites	probable trehalose-phosphate phosphatase D [Chenopodium quinoa]	TPPD_ARATH RecName: Full=Probable trehalose-phosphate phosphatase D; Short=AtTPPD; EC=3.1.3.12; AltName: Full=Trehalose 6-phosphate phosphatase;	A0A803ME37_CHEQI SubName: Full=Uncharacterized protein {ECO:0000313|EnsemblPlants:AUR62027730-RA:cds};	At1g35910	GO:0009507,chloroplast; GO:0015927,trehalase activity; GO:0004805,trehalose-phosphatase activity; GO:0006970,response to osmotic stress; GO:0006979,response to oxidative stress; GO:0009651,response to salt stress; GO:0005992,trehalose biosynthetic process; GO:0003674,molecular_function; GO:0003824,catalytic activity; GO:0004553,hydrolase activity, hydrolyzing O-glycosyl compounds; GO:0016787,hydr…	PF02358.16:Trehalose-phosphatase	--	--	--
AUR62035839	0	0.01	0.04	0	0.03	0.01	0	1	4	0	3	1	C_Quinoa_Scaffold_1759	1363165	1381138	-	AUR62035839	--	K16055 trehalose 6-phosphate synthase/phosphatase [EC:2.4.1.15 3.1.3.12] | (RefSeq) alpha,alpha-trehalose-phosphate synthase [UDP-forming] 1-like isoform X1 (A)	ko00500: Starch and sucrose metabolism; ko01100: Metabolic pathways; ko01110: Biosynthesis of secondary metabolites	alpha,alpha-trehalose-phosphate synthase [UDP-forming]	TPS1_ARATH RecName: Full=Alpha,alpha-trehalose-phosphate synthase [UDP-forming] 1; EC=2.4.1.15; AltName: Full=Trehalose-6-phosphate synthase 1; Short=AtTPS1;	A0A803MVB2_CHEQI SubName: Full=Uncharacterized protein {ECO:0000313|EnsemblPlants:AUR62035839-RA:cds};	At1g78580	GO:0005618,cell wall; GO:0005829,cytosol; GO:0005576,extracellular region; GO:0005773,vacuole; GO:0003825,alpha,alpha-trehalose-phosphate synthase (UDP-forming) activity; GO:0051301,cell division; GO:0009793,embryo development ending in seed dormancy; GO:0009832,plant-type cell wall biogenesis; GO:0010182,sugar mediated signaling pathway; GO:0005991,trehalose metabolic process; GO:0003674,molecul…	PF00982.21:Glycosyltransferase family 20	--	--	--
AUR62039934	1.38	1.58	1.51	1.69	1.76	1.61	93	125	109	143	131	98	C_Quinoa_Scaffold_3651	310550	317771	-	AUR62039934	--	K01087 trehalose 6-phosphate phosphatase [EC:3.1.3.12] | (RefSeq) probable trehalose-phosphate phosphatase F isoform X1 (A)	ko00500: Starch and sucrose metabolism; ko01100: Metabolic pathways; ko01110: Biosynthesis of secondary metabolites	probable trehalose-phosphate phosphatase F isoform X1 [Chenopodium quinoa]	TPPG_ARATH RecName: Full=Probable trehalose-phosphate phosphatase G; Short=AtTPPG; EC=3.1.3.12; AltName: Full=Trehalose 6-phosphate phosphatase; AltName: Full=Trehalose-phosphate phosphatase 6;	A0A803N3Q5_CHEQI SubName: Full=Uncharacterized protein {ECO:0000313|EnsemblPlants:AUR62039934-RA:cds};	At4g22590	GO:0004805,trehalose-phosphatase activity; GO:0005992,trehalose biosynthetic process; GO:0003674,molecular_function; GO:0003824,catalytic activity; GO:0016787,hydrolase activity; GO:0016788,hydrolase activity, acting on ester bonds; GO:0016791,phosphatase activity; GO:0019203,carbohydrate phosphatase activity; GO:0042578,phosphoric ester hydrolase activity; GO:0005975,carbohydrate metabolic proce…	PF02358.16:Trehalose-phosphatase	--	--	--
AUR62040284	6.95	6.81	7	10.92	10.49	10.37	665	766	717	1309	1108	895	C_Quinoa_Scaffold_1385	70031	74078	+	AUR62040284	Probable alpha%2Calpha-trehalose-phosphate synthase [UDP-forming] 11 [Source:Projected from Arabidopsis thaliana (AT2G18700) UniProtKB/Swiss-Prot%3BAcc:Q9ZV48]	K16055 trehalose 6-phosphate synthase/phosphatase [EC:2.4.1.15 3.1.3.12] | (RefSeq) alpha,alpha-trehalose-phosphate synthase [UDP-forming] 5-like (A)	ko00500: Starch and sucrose metabolism; ko01100: Metabolic pathways; ko01110: Biosynthesis of secondary metabolites	alpha,alpha-trehalose-phosphate synthase [UDP-forming]	TPS9_ARATH RecName: Full=Probable alpha,alpha-trehalose-phosphate synthase [UDP-forming] 9; EC=2.4.1.15; AltName: Full=Trehalose-6-phosphate synthase 9; Short=AtTPS9;	A0A803N4G8_CHEQI SubName: Full=Uncharacterized protein {ECO:0000313|EnsemblPlants:AUR62040284-RA:cds};	At1g23870	GO:0005829,cytosol; GO:0016757,transferase activity, transferring glycosyl groups; GO:0016311,dephosphorylation; GO:0003674,molecular_function; GO:0003824,catalytic activity; GO:0016740,transferase activity; GO:0006793,phosphorus metabolic process; GO:0006796,phosphate-containing compound metabolic process; GO:0008150,biological_process; GO:0008152,metabolic process; GO:0009987,cellular process; …	PF00982.21:Glycosyltransferase family 20	--	--	--
